# Supplementary material
Source: publisher figshare collection journal article supplement (https://gsapubs.figshare.com/ndownloader/files/23300594)
Supplement: Supplementary file 1 [file 23300594]

## Sheet: Goa_lowland
CAU-1a	J=0.00395580±0.00000475		Spectro : ARGUS IV
Relative Abundances			36Ar [fA]	%1s	37Ar [fA]	%1s	38Ar [fA]	%1s	39Ar [fA]	%1s	40Ar [fA]	%1s	40*/39(k)	± 2s	Age	± 2s	40Ar*	39Ar(k)	K/Ca	± 2s
															(Ma)		(%)	(%)
18_CAU1A_	3		4.51602	0.477351	43.5499	5.8603	1.3655	1.12644	5.61404	0.643982	1360.56	0.255186	2.85746	2.99338	20.2781	21.1237	1.17241	0.604741	0.0551189	0.00785429
20_CAU1A_	3.5		2.27268	0.432123	36.6038	12.8168	0.89051	1.67742	15.2586	0.154859	717.149	0.0718304	2.73215	0.475865	19.3936	3.35973	5.80301	1.65009	0.178937	0.0480532
21_CAU1A_	4		2.05018	0.392914	34.6492	13.7731	0.883057	1.87011	22.4005	0.164271	673.571	0.0763415	2.87059	0.276478	20.3707	1.95095	9.5358	2.42393	0.27768	0.0796561
22_CAU1A_	4.5		0.763622	0.466334	18.2602	24.101	0.678404	3.0968	26.4879	0.127698	41967	0.169848	2.80282	0.106973	19.8924	0.755048	24.6624	2.868	0.623435	0.304623
24_CAU1A_	5		0.235595	1.0381	18.6025	23.7693	0.653277	2.81131	39.9228	0.100635	181.562	0.27472	2.81728	0.0496591	19.9945	0.35049	61.9268	4.32338	0.922511	0.44472
25_CAU1A_	5.3		0.191578	1.25304	17.2597	27.9225	0.768086	2.16206	51.3228	0.0973207	201.936	0.26289	2.84008	0.0392771	20.1554	0.277189	72.1641	5.55845	1.27832	0.72117
26_CAU1A_	5.6		0.210138	3.75757	14.006	25.4081	1.1437	1.62731	83.7749	0.0993169	320.124	1.21993	3.07741	0.109421	21.8295	0.771502	80.5244	9.07425	2.57168	1.32294
28_CAU1A_	5.9		0.214924	8.72691	4.18793	83.4773	2.21947	2.1315	164.392	0.100615	610.894	0.772891	3.31832	0.0894697	23.5273	0.630234	89.2943	17.8083	16.8788	28.2122
29_CAU1A_	6.2		0.200666	9.46763	23.746	29.9164	3.05311	1.98635	232.173	0.0945473	842.479	0.263213	3.36998	0.0531348	23.8912	0.374211	92.8641	25.1495	4.20394	2.53773
30_CAU1A_	6.5		0.0858509	12.755	-3.16533	90.1901	1.69274	1.07998	128.775	0.0961146	448.245	1.0506	3.26994	0.0893469	23.1865	0.629487	93.9427	13.9504	-17.4939	31.5866
32_CAU1A_	6.8		0.0580904	13.4787	-1.21155	291.762	0.891483	3.8596	68.163	0.102645	226.824	1.26409	3.06198	0.109104	21.7207	0.769308	92.0167	7.38422	-24.1926	141.183
33_CAU1A_	7.1		0.0629348	13.6827	0.72994	342.136	0.629049	3.2905	45.4181	0.110967	146.511	1.63733	2.80384	0.155276	19.8997	1.09598	86.9176	4.92009	26.755	183.089
34_CAU1A_	7.5		0.0496866	17.3546	0.843831	320.119	0.413439	5.18845	29.8274	0.125818	99.5771	2.40903	2.8339	0.236592	20.1118	1.66974	84.8852	3.23115	15.1992	97.3184
36_CAU1A_	8		0.0303734	1.54902	-1.78502	106.081	0.205951	5.06601	9.7238	0.185871	40.283	0.133436	3.18423	0.0474465	22.5826	0.334393	76.8736	1.05352	-2.34272	4.97388
		S	10.9423	0.382905	206.277	7.29692	15.4878	0.663652	923.253	0.036799	6170.59	0.160224
CAU-1c	J=0.00395580±0.00000475		Spectro : ARGUS IV
Relative Abundances			36Ar [fA]	%1s	37Ar [fA]	%1s	38Ar [fA]	%1s	39Ar [fA]	%1s	40Ar [fA]	%1s	40(r)/39(k)	± 2s	Age	± 2s	40Ar(r)	39Ar(k)	K/Ca	± 2s
															(Ma)		(%)	(%)
06_CAU1C_	3		2.95593	0.414613	36.5544	4.95002	1.18858	1.54476	7.49918	0.219328	879.129	0.048511	-0.0432042	1.21342	-0.308356	8.66114	-0.0367236	0.878788	0.0879024	0.0111952
08_CAU1C_	3.5		3.30157	0.406045	31.9478	3.60088	1.26159	1.33722	9.28493	0.280843	995.971	0.0476076	1.39414	1.07867	9.92204	7.65578	1.29643	1.08919	0.124657	0.0134366
09_CAU1C_	4		4.36677	0.406887	37.8926	3.44401	1.44623	1.45221	15.4601	0.134758	1336.9	0.0355138	2.34966	0.855751	16.6911	6.05088	2.71235	1.81488	0.175126	0.0184937
010_CAU1C_	4.5		2.90554	0.405914	29.3235	4.52025	1.09697	1.10101	21.1139	0.133558	922.462	0.0501933	2.71663	0.417269	19.284	2.94621	6.21172	2.48051	0.309301	0.0373477
012_CAU1C_	5		2.80819	0.412377	21.322	6.43244	1.08111	1.99387	24.0457	0.140338	900.74	0.0470922	2.6603	0.357539	18.8862	2.52503	7.09723	2.82598	0.484618	0.0734294
013_CAU1C_	5.3		0.682495	0.507688	7.84246	28.8308	0.43807	4.67781	18.9664	0.188583	257.911	0.15844	2.88154	0.135773	20.448	0.958032	21.184	2.2298	1.03961	0.605211
014_CAU1C_	5.6		0.233447	0.730073	11.098	11.3517	0.336339	6.02972	20.6291	0.158984	129.018	0.330968	2.91325	0.0689002	20.6717	0.486109	46.5627	2.42505	0.798976	0.192343
4_CAU1C_	5.9		0.28542	2.33429	4.93811	52.8179	0.611927	5.55342	37.4476	0.124418	197.274	0.741261	2.99436	0.133315	21.2439	0.940275	56.835	4.40346	3.26055	3.45417
5_CAU1C_	6.2		0.427052	1.68563	5.19248	70.435	0.909102	4.49592	54.4164	0.102057	297.709	0.237124	3.12662	0.0853485	22.1765	0.601654	57.1456	6.39899	4.50602	6.35786
6_CAU1C_	6.5		0.683213	1.69385	17.3075	11.2207	1.1878	3.43347	66.8703	0.103811	415.686	1.34062	3.17908	0.19716	22.5462	1.38957	51.1314	7.86255	1.66106	0.395758
8_CAU1C_	6.8		0.207712	5.55373	5.09086	41.3332	2.81717	1.03873	189.333	0.101536	650.668	0.140587	3.10177	0.0382648	22.0013	0.269769	90.2544	22.2654	15.9917	13.2816
9_CAU1C_	7.1		0.11487	19.2034	13.9323	29.2904	1.74332	2.08653	126.988	0.105879	411.871	0.668723	2.9733	0.112762	21.0953	0.795379	91.6653	14.9328	3.91898	2.31709
10_CAU1C_	7.4		0.10298	3.80347	0.353989	621.535	1.15565	3.3932	87.2955	0.114463	280.589	0.325101	2.85271	0.0349353	20.2445	0.246536	88.7519	10.266	106.04	1318.18
12_CAU1C_	7.7		0.0909888	2.16482	-1.95185	133.733	0.698318	2.79167	48.2258	0.106866	161.581	0.33801	2.77397	0.0352304	19.6888	0.248695	82.7946	5.67158	-10.6246	28.4299
13_CAU1C_	8		0.0817068	2.29557	0.470467	666.908	0.499815	5.38221	32.4077	0.108367	114.408	0.478118	2.76912	0.0516496	19.6545	0.364607	78.4385	3.81114	29.6198	395.081
14_CAU1C_	9		0.141869	1.40154	-0.534088	444.453	0.6958	2.82196	45.5002	0.105994	166.914	0.327644	2.72679	0.0374694	19.3557	0.264549	74.3321	5.35093	-36.6331	325.647
16_CAU1C_	12		0.191802	1.17931	-6.29791	38.4345	0.747016	2.17713	45.0032	0.108125	177.785	0.307476	2.65605	0.0408481	18.8562	0.288484	67.2402	5.29297	-3.07298	2.37494
		S	19.5816	0.217587	214.483	4.53623	17.9148	0.623187	850.487	0.0351461	8296.61	0.0813191
CAU-3a	J=0.00395580±0.00000475		Spectro : ARGUS IV
Relative Abundances			36Ar [fA]	%1s	37Ar [fA]	%1s	38Ar [fA]	%1s	39Ar [fA]	%1s	40Ar [fA]	%1s	40*/39(k)	± 2s	Age	± 2s	40Ar*	39Ar(k)	K/Ca	± 2s
															(Ma)		(%)	(%)
18_CAU3A_	3.5		2.2527	0.466412	17.6481	36.2028	0.714955	2.74915	7.10696	0.289322	695.719	0.188995	3.46778	1.12519	24.5798	7.92135	3.53604	0.699025	0.17285	0.125919
20_CAU3A_	4		2.14732	0.427223	15.1403	28.3439	0.854097	3.41485	14.0449	0.161284	677.891	0.163078	2.70444	0.504821	19.1979	3.56456	5.59882	1.38284	0.398579	0.228188
21_CAU3A_	4.5		2.22602	0.389378	22.1679	18.9885	0.862905	2.12557	20.0461	0.110005	719.948	0.152657	2.84873	0.345779	20.2164	2.44018	7.92556	1.97366	0.388529	0.150792
22_CAU3A_	5		1.17418	0.56011	3.07897	190.743	0.61635	3.26087	21.0334	0.122227	408.699	0.285589	2.76716	0.243983	19.6407	1.72234	14.2395	2.07232	2.93716	11.2073
24_CAU3A_	5.3		0.331018	1.10473	14.5538	29.5782	0.406194	5.04653	20.9485	0.141892	156.949	0.1961	2.82593	0.117632	20.0555	0.830209	37.6995	2.06313	0.618622	0.369289
25_CAU3A_	5.6		0.183953	1.72605	11.8371	39.5368	0.427402	5.58728	24.8448	0.136408	125.254	0.253419	2.86316	0.0881028	20.3183	0.62171	56.7727	2.44725	0.902213	0.717058
26_CAU3A_	5.9		0.156278	2.06865	-6.68326	67.8024	0.428279	4.90343	30.3017	0.121484	133.886	0.225424	2.84952	0.0724619	20.222	0.511365	64.5021	2.98628	-1.94992	2.64879
28_CAU3A_	6.2		0.146596	2.67988	4.39217	88.7587	0.555135	3.87108	36.4632	0.110844	151.014	0.47301	2.94214	0.0781461	20.8756	0.551279	71.0337	3.59261	3.56949	6.34291
29_CAU3A_	6.5		0.15826	2.53959	9.51032	43.3921	0.537045	2.94563	35.6433	0.105449	153.263	0.456088	2.98811	0.0810678	21.1998	0.571787	69.4789	3.51145	1.61127	1.40426
30_CAU3A_	6.8		0.191008	1.2636	12.7094	23.2167	0.664209	2.16007	46.0625	0.105995	200.556	1.87638	3.13061	0.167052	22.2046	1.1776	71.8877	4.53788	1.55812	0.734157
32_CAU3A_	7.2		0.232256	3.87275	9.80682	28.7572	0.93388	4.64069	65.165	0.152112	283.38	0.570968	3.28815	0.0972442	23.3148	0.685079	75.605	6.42037	2.85698	1.65902
33_CAU3A_	7.5		0.186874	8.66004	3.36755	68.4132	2.26066	1.94836	167.838	0.088232	617.665	0.0747874	3.33978	0.0582203	23.6785	0.410076	90.7507	16.5378	21.4308	29.3731
34_CAU3A_	7.8		0.152025	2.91992	2.24741	171.304	2.22617	0.770836	169.824	0.0729398	616.408	0.579496	3.3539	0.0453326	23.7779	0.319283	92.401	16.7336	32.4924	111.352
36_CAU3A_	8.5		0.0639352	13.9558	2.48021	130.478	1.3051	3.35986	99.4785	0.121485	352.466	0.128819	3.34377	0.0552318	23.7066	0.38902	94.3713	9.80199	17.2465	45.0268
37_CAU3A_	9		0.0590189	15.0796	-2.56009	130.499	0.978539	4.45111	72.3497	0.139087	252.429	0.179434	3.23266	0.0754842	22.9238	0.531896	92.6546	7.1292	-12.1524	31.7324
38_CAU3A_	9		0.0655049	4.84984	0.422258	1074.17	0.934827	2.87336	66.3406	0.0884303	228.251	0.255872	3.13667	0.0360542	22.2473	0.25415	91.166	6.53688	67.5567	1451.36
40_CAU3A_	10		0.0718457	3.67328	4.55087	53.9236	0.792799	3.68822	49.2345	0.125796	161.293	0.254775	2.83879	0.0378737	20.1463	0.267287	86.6479	4.85102	4.65173	5.03056
41_CAU3A_	12		0.153175	1.70302	10.993	31.1396	1.05817	3.46024	68.2344	0.102166	242.123	0.170948	2.88269	0.0281631	20.4561	0.198722	81.2294	6.72273	2.66873	1.67573
		S	9.95196	0.306339	135.663	12.7966	16.5567	0.744067	1014.96	0.0303466	6177.19	0.0993348
								TABLE DR3
NAV-3b	J=0.00402950±0.00000363		Spectro : ARGUS IV
Relative Abundances			36Ar [mV]	%1s	37Ar [mV]	%1s	38Ar [mV]	%1s	39Ar [mV]	%1s	40Ar [mV]	%1s	40*/39(k)	± 2s	Age	± 2s	40Ar*	39Ar(k)	K/Ca	± 2s
															(Ma)		(%)	(%)
9_NAV-3B	0.04		24.0719	0.570761	974.85	3.79991	6.45203	0.488795	29.2382	0.264365	7129.98	0.0478117	3.49467	3.35953	25.2867	24.1397	1.39834	1.97172	0.0125842	0.000959743
10_NAV-3B	0.05		11.5804	0.573618	648.562	5.972	3.4806	0.788654	32.7046	0.237448	3580.65	0.0833625	6.62952	1.45997	47.6728	10.3614	5.9679	2.22769	0.0213707	0.00255511
12_NAV-3B	0.055		3.90364	0.6156	440.098	9.45905	1.59027	1.42436	37.1487	0.212937	1332.08	0.22652	5.85733	0.520646	42.1843	3.70627	16.1941	2.5453	0.0359837	0.00680954
13_NAV-3B	0.06		1.468	0.768221	261.464	33.7738	0.998112	1.99812	41.1356	0.211653	651.098	0.458068	5.84172	0.4382	42.0731	3.11957	36.7368	2.82982	0.0673386	0.045487
14_NAV-3B	0.063		0.62613	1.39272	225.925	12.9361	0.901243	2.37453	45.2578	0.204429	420.622	0.721226	5.64217	0.216348	40.6519	1.5414	60.4879	3.1165	0.0858258	0.0222079
16_NAV-3B	0.066		0.450185	1.7952	79.9672	112.109	0.649674	3.459	35.6219	0.236349	327.276	0.913989	5.6441	0.482334	40.6657	3.43643	61.3321	2.45787	0.191234	0.428782
17_NAV-3B	0.069		0.391032	2.03674	142.131	56.4913	0.620744	3.35514	33.6207	0.221857	311.508	0.958225	6.19825	0.470106	44.6095	3.34201	66.6914	2.31644	0.101402	0.114568
18_NAV-3B	0.072		0.383583	2.10373	36.5946	75.6857	0.679554	3.69194	38.3892	0.210532	344.616	0.884798	6.10043	0.238775	43.914	1.69812	67.9099	2.65131	0.450774	0.682347
20_NAV-3B	0.075		0.617538	1.3671	-31.806	80.7776	1.25374	1.67753	78.9865	0.161886	680.972	0.443086	6.26551	0.116572	45.0876	0.8285	72.6954	5.4605	-1.06817	1.72569
21_NAV-3B	0.078		0.845306	5.63621	17.6699	160.546	2.49773	1.98333	170.346	0.15533	1357.71	0.6929	6.50367	0.202107	46.7795	1.43507	81.593	11.7721	4.1451	13.3095
22_NAV-3B	0.081		1.37529	5.03181	30.904	95.6682	6.90867	1.09854	507.107	0.144283	3567.85	0.541297	6.23009	0.112965	44.8358	0.802974	88.5458	35.0455	7.05559	13.4999
24_NAV-3B	0.084		0.427832	1.74057	123.379	33.3967	1.98059	1.11764	144.058	0.14282	941.179	0.184777	5.72255	0.0652873	41.2246	0.465001	87.5356	9.94991	0.50176	0.335146
25_NAV-3B	0.087		0.347291	2.17431	49.9188	77.3681	1.04307	2.38331	69.6635	0.160966	458.658	0.47796	5.16493	0.132005	37.2486	0.942262	78.4069	4.81206	0.599768	0.928059
26_NAV-3B	0.09		0.273815	2.70835	2.3805	946.327	0.67071	3.4401	47.3429	0.189049	301.25	0.727836	4.64885	0.155478	33.561	1.11208	73.0564	3.27184	8.55146	161.85
28_NAV-3B	0.1		0.424388	1.79876	43.4034	57.2907	0.923435	2.17978	61.7075	0.172804	406.348	0.539499	4.60544	0.12494	33.2505	0.893805	69.9019	4.26253	0.611027	0.700126
29_NAV-3B	0.12		0.597971	1.36307	-2.02297	1208.85	1.19092	2.10022	76.8151	0.165151	517.295	0.423634	4.42211	0.102965	31.9385	0.737134	65.6669	5.30893	-16.328	394.761
		S	47.7842	0.37252	3043.42	6.21358	31.8411	0.397414	1449.14	0.0603822	22329.1	0.106708
NAV-3c	J=0.00402950±0.00000363		Spectro : ARGUS IV
Relative Abundances			36Ar [mV]	%1s	37Ar [mV]	%1s	38Ar [mV]	%1s	39Ar [mV]	%1s	40Ar [mV]	%1s	40(r)/39(k)	± 2s	Age	± 2s	40Ar(r)	39Ar(k)	K/Ca	± 2s
															(Ma)		(%)	(%)
30_NAV-3C	0.04		8.75265	0.595553	426.757	8.16471	2.51433	1.68973	13.5829	0.721792	2603.85	0.127957	4.05	2.78278	29.2726	19.9515	2.06442	1.15047	0.0133736	0.00219362
33_NAV-3C	0.05		11.2143	0.582812	585.352	5.5456	3.50839	1.32849	33.1208	0.329212	3477.95	0.0949406	6.53924	1.40857	47.032	10.0002	6.14737	2.83401	0.024018	0.00266915
34_NAV-3C	0.055		2.90835	0.748973	363.035	9.85805	1.30224	2.81615	25.208	0.398788	989.55	0.337582	6.44893	0.688206	46.3907	4.88768	16.2561	2.16214	0.0295452	0.00583047
35_NAV-3C	0.06		1.39473	1.12478	296.643	15.241	0.865514	4.48949	26.5601	0.387075	549.448	0.614253	6.16229	0.547077	44.3538	3.88976	29.5463	2.28352	0.0381876	0.0116446
37_NAV-3C	0.063		0.530153	2.67128	210.517	22.2677	0.707024	4.91424	31.431	0.456349	319.566	1.05991	5.77253	0.437679	41.5805	3.11671	56.4996	2.71116	0.063888	0.0284592
38_NAV-3C	0.066		0.335936	4.08267	277.148	24.5691	0.528844	6.69926	26.4947	0.449604	241.116	1.41237	6.28306	0.608762	45.2123	4.32628	68.5154	2.27908	0.0407943	0.0200496
39_NAV-3C	0.069		0.241142	5.62775	141.643	27.4389	0.412575	9.54431	21.1454	1.12745	190.018	1.74074	6.20784	0.606182	44.6777	4.30922	68.7449	1.82394	0.0638805	0.0350865
41_NAV-3C	0.072		0.242656	5.55903	143.187	33.8175	0.448551	8.68907	26.2855	0.390626	224.302	1.49073	6.28464	0.51255	45.2236	3.64251	73.3568	2.26939	0.0786245	0.0531817
42_NAV-3C	0.075		0.329281	4.11511	92.9742	36.3418	0.553563	6.93639	27.993	0.391787	269.873	1.22591	6.45414	0.430102	46.4277	3.05455	66.7849	2.42056	0.129153	0.0938791
43_NAV-3C	0.078		0.479685	2.86722	19.0977	187.128	0.831439	4.51799	46.1147	0.251114	435.65	0.758441	6.40131	0.265706	46.0525	1.88741	67.7391	3.996	1.038	3.88477
45_NAV-3C	0.081		0.382928	3.56167	27.6454	116.22	0.714079	5.61351	44.3478	0.257238	406.026	0.814212	6.65059	0.268506	47.8223	1.90544	72.6075	3.8423	0.68948	1.60263
46_NAV-3C	0.083		0.441581	7.20222	-103.954	75.4091	1.52776	2.37346	108.282	0.178009	879.165	0.974961	6.81805	0.266618	49.0103	1.8908	84.0328	9.39237	-0.448213	0.675989
47_NAV-3C	0.086		0.82515	3.86262	17.7697	164.163	5.19837	0.801183	390.942	0.145434	2804.07	0.284049	6.54328	0.0672739	47.0607	0.477606	91.2232	33.8856	9.45988	31.0592
4_NAV-3C	0.09		0.296675	10.7894	66.4975	76.2413	1.84036	1.67106	134.998	0.164581	909.669	0.844614	6.12346	0.19278	44.0777	1.37089	90.8418	11.6974	0.872641	1.33063
5_NAV-3C	0.095		0.274793	9.8516	105.683	37.9421	1.09678	2.48646	79.8466	0.223981	497.948	1.43742	5.32747	0.283789	38.4084	2.02441	85.3444	6.9144	0.324564	0.246297
6_NAV-3C	0.1		0.265903	10.0891	38.147	42.7284	0.770335	2.49526	53.8095	0.282571	325.93	2.19595	4.65	0.401554	33.5692	2.87216	76.7297	4.66178	0.606239	0.518084
8_NAV-3C	0.12		0.370818	7.51959	48.8411	48.7617	1.02381	2.95948	65.5177	0.24918	401.063	1.78814	4.50543	0.340341	32.5349	2.43572	73.561	5.67596	0.57651	0.562239
		S	29.2867	0.40839	2756.98	6.46207	23.844	0.63442	1155.68	0.0710545	15525.2	0.139992
NAV-3f	J=0.00272700±0.00000682		Spectro : VG 3600
Relative Abundances			36Ar [mV]	%1s	37Ar [mV]	%1s	38Ar [mV]	%1s	39Ar [mV]	%1s	40Ar [mV]	%1s	40(r)/39(k)	± 2s	Age	± 2s	40Ar(r)	39Ar(k)	K/Ca	± 2s
															(Ma)		(%)	(%)
33260_ARCALC	600		3.0295e-05	53.6622	0.000336529	92.4426	6.61818e-05	26.2038	0.000854448	5.74277	0.013785	2.92372	5.68804	11.3066	27.834	54.9043	35.2465	0.146692	1.09146	2.02184
33261_ARCALC	650		1.94399e-05	75.3131	0.000414858	74.9197	0.000121648	13.7489	0.00384142	0.692001	0.0686538	0.571803	16.3793	2.27331	79.0192	10.731	91.641	0.659635	3.98132	5.96583
33262_ARCALC	700		7.44826e-05	19.4182	5.97126e-05	521.472	0.000194179	8.52868	0.00835729	0.612173	0.0925542	0.430756	8.43301	1.0326	41.1146	4.97756	76.1464	1.43519	60.1819	627.663
33263_ARCALC	750		0.000326089	15.9915	7.64814e-05	589.195	0.000305837	8.15021	0.0156988	0.21592	0.125735	0.765421	1.86222	1.96744	9.15991	9.65299	23.2509	2.69594	88.2627	1040.08
33264_ARCALC	800		0.00013421	38.761	-0.000178651	252.192	0.000470981	5.3336	0.0288385	0.218745	0.0990994	0.95603	2.05119	1.0682	10.0868	5.23828	59.6912	4.95245	-69.4126	350.106
33265_ARCALC	850		9.68382e-05	53.933	0.000190777	236.068	0.00100551	3.96569	0.0689251	0.184155	0.167951	0.562818	2.01224	0.44874	9.89581	2.20079	82.5801	11.8365	155.353	733.475
33266_ARCALC	900		0.00020733	10.1386	0.000723154	42.9463	0.00232095	1.76398	0.189434	0.206813	0.399965	0.175776	1.77859	0.0664504	8.74955	0.326104	84.2386	32.5314	112.641	96.751
33267_ARCALC	950		0.000161511	4.77105	-0.000593053	35.1007	0.00129408	1.69763	0.127195	0.164314	0.272028	0.280815	1.75335	0.0383005	8.62569	0.187972	81.9836	21.8432	-92.2244	64.7436
33268_ARCALC	1000		9.43923e-05	9.41311	0.000240179	87.0359	0.000827043	2.66725	0.0582583	0.180168	0.129507	0.49093	1.73497	0.0930172	8.53544	0.456534	78.0467	10.0046	104.301	181.56
33270_ARCALC	1450		0.0001905	27.3842	0.00059234	76	0.00106642	2.25401	0.0809093	0.186792	0.27365	0.432459	2.67738	0.382338	13.1549	1.87175	79.1609	13.8944	58.7345	89.2768
		S	0.00133509	8.25364	0.00186233	60.8776	0.00767283	1.0842	0.582312	0.0872271	1.64293	0.150026
													TABLE DR3 (continued)
Step	Temperature	40Ar/39Ar	38Ar/39Ar	37Ar/39Ar	36Ar/39Ar	39Ar	%39Ar	%40Ar*	40Ar*/39K	Age	± s.d.
NAV-4f	°C				(E-3)	(E-14)	released			Ma
Spectro : VG 3600						moles
J= 0.002727
1	350	233329	1.04	66.3975	1039.77	0	0	99.87	0	0	± 0
2	450	477.918	0.409	0.01935	1647.58	0.015	3.91	-1.88	-8.96	0	± 0
3	550	8.185	0.118	0.0005	22.722	0.016	8.2	17.72	1.45	7.121	± 3.503
4	600	1.64418e+06	1.04	66.3975	5.89837e+06	0	8.2	-6.01	-103238	0	± 0
5	650	8.153	0	0.00269	77.269	0.003	9.01	-180.3	-14.7	0	± 0
6	700	6.563	0.021	0.00012	7.719	0.067	26.42	64.94	4.26	20.848	± 0.988
7	750	6.456	0.008	0.00016	7.304	0.052	40.09	66.26	4.28	20.923	± 1.073
8	800	10.924	0.015	0.00011	22.598	0.073	59.13	38.69	4.23	20.676	± 1.731
9	850	6.353	0.014	0.00011	0.002	0.075	78.77	99.68	6.33	30.89	± 0.089
10	900	8.322	0.012	0.00021	0.003	0.039	89.07	99.75	8.3	40.385	± 0.211
11	950	26.545	0.032	0.00157	24.211	0.005	90.45	72.97	19.37	92.865	± 18.47
12	1000	31.473	0	0.00246	18.469	0.003	91.33	82.6	26	123.561	± 8.969
13	1200	6.321	0.002	0.00038	8.767	0.022	97.05	58.7	3.71	18.162	± 2.383
14	1450	8.936	0	0.00073	25.99	0.011	100	13.83	1.24	6.07	± 6.384
Step	Temperature	40Ar/39Ar	38Ar/39Ar	37Ar/39Ar	36Ar/39Ar	39Ar	%39Ar	%40Ar*	40Ar*/39K	Age	± s.d.
CAU-3f	°C				(E-3)	(E-14)	released			Ma
Spectro : VG 3600						moles
J= 0.002727
1	550	5.946	0.211	0.00042	27.703	0.019	4.68	-38	-2.26	0	± 0
2	600	4.964	0.071	0.00056	0.009	0.014	8.2	99.54	4.94	24.146	± 0.216
3	650	6.494	0.026	0.00027	3.348	0.029	15.57	84.46	5.49	26.786	± 1.404
4	700	6.145	0.021	0.00017	6.785	0.047	27.41	67.05	4.12	20.159	± 2.29
5	750	5.065	0.02	8e-05	3.36	0.097	52.01	80	4.05	19.826	± 1.234
6	800	9.738	0.021	9e-05	19.76	0.088	74.3	39.84	3.88	18.985	± 0.934
7	850	5.171	0.02	0.00013	2.684	0.061	89.72	84.27	4.36	21.315	± 0.494
8	950	11.343	0.048	0.00039	9.709	0.02	94.84	74.53	8.45	41.119	± 1.734
9	1000	28.501	0	0.00398	61.908	0.002	95.34	35.75	10.19	49.439	± 11.841
10	1200	13.136	0.009	0.53894	10.137	0.015	99.15	77.29	10.16	49.29	± 1.805
11	1450	52.209	0	30714.4	59.822	0.003	100	99.96	-99.93	0	± 0
					TABLE DR3 (continued)
